Title: THE EFFECTS OF NITROUS OXIDE ON THE PULMONARY CIRCULATION AND RIGHT VENTRICULAR FUNCTION IN PATIENTS WITH PULMONARY HYPERTENSION

Authors: SN Konstadt, M.D., DL Reich, M.D., Karen Yeager-Costosco, R.N., and DM Thys, M.D.

Affiliation: Department of Anesthesiology, Mount Sinai School of Medicine, One Gustave Levy Place, New York, NY 10029

**Introduction** Though nitrous oxide (N<sub>2</sub>O) may be a useful adjunct to narcotic anesthesia, its use has been restricted in patients with pulmonary hypertension (PHT) because it may increase pulmonary vascular resistance (PVR). In a previous study of patients with PHT, N<sub>2</sub>O resulted in a marked increase in PVR without any significant change in central venous pressure (CVP).<sup>1</sup> However, the compliant right ventricle might have dilated significantly without a significant change in CVP. Thus the clinical significance of this observed increase in PVR is unclear. The purpose of this study was to reexamine the effects of N<sub>2</sub>O on the pulmonary circulation using the rapid-response pulmonary artery catheter (RRPAC), and to determine if significant changes in right ventricular function occur as a result of N<sub>2</sub>O.

**Methods** Ten patients with PHT secondary to mitral valvular disease presenting for mitral valve repair or replacement surgery were studied. All patients were in normal sinus rhythm. Written informed consent was obtained and the study protocol was approved by the institutional human investigations committee. A radial arterial catheter and RRPAC were inserted and connected to aneroid-calibrated transducers placed at the level of the right atrium. Patients were anesthetized with fentanyl 50-75 mcg/kg, pancuronium 0.1 mg/kg, and oxygen 100%. Baseline measurements were obtained 10 minutes after the induction of anesthesia and consisted of heart rate (HR), mean arterial pressure (MAP), pulmonary capillary wedge pressure (PCWP), mean pulmonary arterial pressure (MPAP), CVP, cardiac output (CO), right ventricular ejection fraction (RVEF), right ventricular end-systolic volume (RVESV), and right ventricular end-diastolic volume (RVEDV). Right ventricular stroke work (RVSW), and PVR were calculated using standard formulae. 70% N<sub>2</sub>O / 30% oxygen was then administered, and the measurements were repeated when a stable end-tidal N<sub>2</sub>O concentration had been reached. A "return to baseline" measurement was obtained on 100% oxygen after the N<sub>2</sub>O had been eliminated. Thermodilution measurements were performed in triplicate using an REF-1<sup>R</sup> American Edwards computer with iced D5W and averaged. Data were analyzed using repeated-measures ANOVA and paired Student's t-test with Bonferroni's modification. Significance was defined as  $p < 0.05$ .

**Results** Nitrous oxide resulted in statistically significant decreases in PAP, PCWP, CO, RVEF, and RVSW (see Table). There were no other significant changes. Return to 100% oxygen resulted in significant decreases in PAP, PCWP, CO, RVEF, and RVSW compared to the baseline measurements. There

were no clinically significant reactions to N<sub>2</sub>O requiring pharmacologic intervention. No significant differences were observed between the N<sub>2</sub>O and "return to baseline" groups.

**Discussion** Nitrous oxide has several desirable anesthetic properties: hypnosis, amnesia, analgesia, and rapid onset and elimination. A previous study demonstrated that, in patients with PHT, N<sub>2</sub>O increased PVR. The anesthetic techniques in that study were either low-dose fentanyl (10 mcg/kg) or halothane. The current study used additional measurements of right ventricular function to examine the effects of N<sub>2</sub>O in patients anesthetized with a high-dose fentanyl (50-75 mcg/kg) technique. The results indicate that N<sub>2</sub>O did not significantly change PVR and actually decreased PAP and RVSW. The observed changes during N<sub>2</sub>O administration in PAP, PCWP, CO, RVEF, and RVSW were similar in magnitude and direction to those observed during the "return to baseline" measurement and were not clinically significant. The similarity in the N<sub>2</sub>O and "return to baseline" data suggest that a gradual decrease in sympathetic tone occurred over time which did not return following the elimination of N<sub>2</sub>O. The small increase in RVESV at the "return to baseline" is statistically significant, but of doubtful clinical significance. It is concluded that N<sub>2</sub>O may be used safely in conjunction with high-dose fentanyl in patients with PHT secondary to mitral valvular disease.

#### Reference

- Schulte-Sasse U, Hess W, Tarnow J: Pulmonary Vascular Responses to Nitrous Oxide in Patients with Normal and High Pulmonary Vascular Resistance. *Anesthesiology* 57:9-13, 1982.

|                            | Means ± S.D. n = 10 |                  |            |
|----------------------------|---------------------|------------------|------------|
|                            | BASELINE            | N <sub>2</sub> O | RTB        |
| HR (bpm)                   | 77±20               | 72±17            | 69±19      |
| MAP (mm Hg)                | 76±14               | 67±12            | 71±13      |
| PAP (mm Hg)                | 37±15               | 33±14*           | 31±14*     |
| PCWP (mm Hg)               | 27±10               | 25±10*           | 24±10*     |
| CVP (mm Hg)                | 13±4                | 12±4             | 11±4       |
| CO (l/min)                 | 3.7±1.4             | 3.2±1.1*         | 3.2±1.1*   |
| RVEF                       | 0.31±0.09           | 0.30±0.09*       | 0.29±0.10* |
| RVESV (ml)                 | 110±35              | 112±34           | 120±45*    |
| RVEDV (ml)                 | 158±38              | 158±34           | 167±45     |
| PVR (d*s/cm <sup>5</sup> ) | 247±191             | 230±135          | 206±130    |
| RVSW (gm-m)                | 17±11               | 13±9*            | 13±9*      |
| PCO <sub>2</sub> (torr)    | 39±15               | 37±14            | ----       |

RTB = RETURN TO BASELINE

\*P < 0.05 compared to baseline
